# Supplementary material
Source: ML conference proceedings conference paper supplement (https://proceedings.mlr.press/v97/sablayrolles19a.html)
Supplement: Supplementary file 1 [file sablayrolles19a-supp.pdf]

## A. Derivations

### A.1. Accuracy of the 0-1 attack

We note  $g_1$  the binary random variable that indicates whether  $z_1$  was classified correctly, and thus considered part of the training set by the 0-1 attack. The attack is accurate if  $g_1 = 1$  on training images and  $g_1 = 0$  on other images. This happens with probability

$$\begin{aligned} p_{\text{Bayes}} &= \mathbb{P}(m_1 = g_1) \\ &= \mathbb{P}(g_1=1 \mid m_1=1)\mathbb{P}(m_1=1) + \mathbb{P}(g_1=0 \mid m_1=0)\mathbb{P}(m_1=0) \\ &= \lambda p_{\text{train}} + (1 - \lambda)(1 - p_{\text{test}}). \end{aligned} \quad (42)$$

### A.2. Gaussian data

**Estimation of average distribution.** We assume without loss of generality that  $\mu = 0$ .  $\theta$  is the mean of  $n$  Gaussian variables, centered on  $\mu$  with covariance  $I$ . Thus,  $\theta$  follows a Gaussian distribution, of variance  $\frac{1}{n}I$ .

$$\int_t e^{-\ell(z,t)} p(t) dt = \frac{1}{\sqrt{\det\left(\frac{2\pi}{n}I\right)}} \int_t e^{-\frac{\|z-t\|^2 - n\|t\|^2}{2}} dt \quad (43)$$

Denoting  $\omega := \frac{z}{n+1}$ , we have

$$n\|t\|^2 + \|z-t\|^2 = (n+1)\|t-\omega\|^2 + \frac{n}{n+1}\|z\|^2, \quad (44)$$

hence

$$\int_t e^{-\frac{\|z-t\|^2 - n\|t\|^2}{2}} dt = \sqrt{\det\left(\frac{2\pi}{n+1}I\right)} e^{-\frac{n\|z\|^2}{2(n+1)}}. \quad (45)$$

We have:

$$\log\left(\int_t e^{-\ell(z,t)} p(t) dt\right) = C - \frac{n}{2(n+1)}\|z\|^2 \quad (46)$$

### A.3. Bound on variations of a sigmoid

We show that

$$\sigma(u) \leq \sigma(v) + |u-v|_+/4 \quad \forall u, v \in \mathbb{R}. \quad (47)$$

Since  $\sigma$  is increasing, the relation is obvious for  $v > u$ .

For  $u > v$ , we observe that

$$\sup_u |\sigma'(u)| = \sup_u \frac{e^{-u}}{(1+e^{-u})^2} = \frac{1}{4}. \quad (48)$$

Thus,  $\sigma$  is Lipschitz-continuous with constant  $1/4$ , which entails Equation (47).

### A.4. Hessian approximations

We give here a rough justification of the approximation conducted in the MATT paragraph of Section 5.

Equation (37) writes:

$$\begin{aligned} \log\left(\frac{\mathbb{P}(\theta \mid m_1 = 1, z_1, \mathcal{T})}{\mathbb{P}(\theta \mid m_1 = 0, z_1, \mathcal{T})}\right) \\ \approx -(\theta - \theta_1^*)^T H(\theta - \theta_1^*) + (\theta - \theta_0^*)^T H(\theta - \theta_0^*). \end{aligned} \quad (49)$$

$$(50)$$

This approximation holds up to the following quantity:

$$\delta = \underbrace{-\frac{1}{2} \log\left(\frac{\det(H_1)}{\det(H_0)}\right)}_{\delta_1} + \underbrace{(\theta_1^* - \theta_0^*)^T (H_1 - H_0) (\theta_1^* - \theta_0^*)}_{\delta_2}. \quad (51)$$

We reason qualitatively in orders of magnitude.  $\theta_0^* - \theta_1^*$  has order of magnitude  $1/n$ , and  $H_1 - H_0$  has order of magnitude 1, so  $\delta_2$  has order of magnitude  $1/n^2$ . As for  $\delta_1$ , we observe that  $H_0^{-1}(H_1 - H_0)$  has order of magnitude  $1/n$  and therefore

$$\delta_1 = -\frac{1}{2} \log\left(\frac{\det(H_1)}{\det(H_0)}\right) \quad (52)$$

$$= -\frac{1}{2} \log(\det(I + H_0^{-1}(H_1 - H_0))) \quad (53)$$

$$\approx -\text{Tr}(H_0^{-1}(H_1 - H_0)). \quad (54)$$

Hence,  $\delta_1$  has order of magnitude  $1/n$  as well. Since the main term in Equation (37) is in the order of  $1/\sqrt{n}$ ,  $\delta_1$  and  $\delta_2$  can be safely neglected.
